# Supplementary material for: Coral reef restoration efforts in Latin American countries and territories
Source: bioRxiv or medRxiv preprint supplement (doi:10.1101/2020.02.16.950998), 2020-02-17
Supplement: Supplementary file [file media-1.pdf]

## 1 **Supplementary information**

### 2 *Coral reef restoration case studies*

3 This overview presents 11 coral reef restoration projects carried out in Spanish-speaking countries in  
4 the Caribbean and Eastern Tropical Pacific. The projects are grouped into those that have commenced  
5 (n = 9) and interventions that were due to start in 2019 (n = 2). All projects are grouped by country,  
6 location and organization with stewardship over the project.

### 7 *Implemented projects*

8 Country: Colombia

9 Location: Taganga

10 Organization: Alianza Coralina Taganga

11 The coral reef restoration project led by Alianza Coralina Taganga is located at the Colombian  
12 Caribbean coast (11.269667° N, -74.203611° W). The project employs a floating mid-water nursery  
13 built of PVC tubes located 5 m below the water surface and which is anchored to the sandy bottom at  
14 a depth of 13 m. Coral fragments are produced by micro-fragmentation of donor colonies, which are  
15 then attached to cement cookies and outplanted once they reach a diameter of 7 cm. Each cement  
16 cookie is connected via a plastic screw to a mesh frame in the coral nursery with a carrying capacity  
17 of 50 – 80 cookies per frame. At this stage of the project, only corals of opportunity (i.e., those found  
18 detached from the substrate as a result of storms, waves or physical damage) are being used as donor  
19 colonies to reduce the impact on living corals. Members from the local community are trained as coral  
20 gardeners to identify corals of opportunity, carry out coral micro-fragmentation and maintain the  
21 nursery. The project will focus on the species *Montastraea cavernosa*, *Porites porites* and *Millepora*  
22 sp. The primary motivation of this project is idealistic following social reasons such as community

23 education and engagement. The secondary motivation is experimental i.e., to improve management  
24 and develop standardized restoration protocols. This project focuses on the promotion and increase  
25 in the value of citizen participation in marine ecosystems conservation by creating activities related to  
26 coral reef restoration. An emphasis is set on improving the education of the local community and on  
27 promoting coral reef research. The specific project objectives are 1) to develop a training centre for  
28 the sustainable use of marine resources and ecological restoration; 2) to establish a community-based  
29 coral reef monitoring system for Taganga Bay and coral nurseries therein with the possible expansion  
30 of monitoring to other areas; 3) to develop a management plan for Taganga Bay as a marine reserve,  
31 which is governed by the local community; and 4) to create a financed organization, which aims to  
32 facilitate long-term ecological reef restoration and research in Taganga Bay. The project has two  
33 phases: phase one has a project duration of two years (2019 – 2020), which aims to train local  
34 community members in Taganga, while phase two relates to a long-term vision of the project leading  
35 to its institutionalisation. Here, we describe the activities of phase one. Corals grown in the mid-water  
36 nursery will be outplanted by drilling holes in the natural substrate with a pneumatic drill and inserting  
37 the plastic nails of the cement cookies carrying the coral fragments into the holes (supported by epoxy  
38 glue where necessary). All outplanted corals at the restoration site will be monitored at least once per  
39 month while they reattach to the natural substrate. The spatial extent of the project is currently a  
40 matter of negotiation that depends on the capacity to recruit coral gardeners from the local  
41 community and to obtain a permit to carry out the ecological restoration work in Taganga Bay. As a  
42 project focused on sustainability and local capability, a large proportion of the estimated project  
43 budget will be directed to activities such as education, community engagement and training while a  
44 minor part will be focused on growing and outplanting corals to the restoration site. An estimated  
45 budget for the project is \$500,000 USD over the next two years. Forty percent of this budget is self-  
46 funded by local stakeholders to accelerate the capacity of coral growth and maintenance of coral  
47 outplanting through local capacity building. This budget is an estimate only; the final figure will depend

48 on the operative capacity and will undergo constant evaluation. The best guess of estimated feasibility  
49 to achieve the four project objectives is 0.5 (minimum of 0.2 and maximum of 0.9).

50

51 Country: Colombia

52 Location: San Andres and Providencia Islands

53 Organization: Corales de Paz

54 In Colombia, a multi-partner collaboration was established in October 2017 to maintain two large-  
55 scale restoration projects located on San Andrés (12.494444° N, -81.735833° W) and Providencia  
56 (13.334722° N, -81.357500° W) islands. Partners include the Secretary of Agriculture and Fisheries  
57 from the Government of the Archipelago of San Andrés, Providencia and Santa Catalina, the provincial  
58 environmental authority CORALINA, Conservation International Colombia, and the NGO Corales de  
59 Paz. Both islands are within the Seaflower Biosphere Reserve in the Colombian Caribbean.

60 The project employs the coral gardening technique where fragments of the species *Acropora palmata*,  
61 *Acropora cervicornis*, *Porites porites*, and *Madracis decactis* are grown in rope nurseries floating at 4  
62 to 6 meters below the water surface (**Fig. 2a**). However, micro-fragmentation is also being employed  
63 during the outplanting phase. The project has already carried out a successful pilot study to identify  
64 adequate restoration sites for the 13,468 fragments currently growing in eight nurseries (5,418 in San  
65 Andres and 8,050 in Providencia). Since October 2018, a total of 3,685 nursery-grown corals of *A.*  
66 *cervicornis* and *A. palmata* have been transplanted to over 2,480 square meters (outplant area; 0.248  
67 ha) of shallow reef (<6 meters). The project has also initiated two micro-fragmentation pilot projects  
68 with *A. palmata*, *Pseudodiploria clivosa*, *Porites astreoides*, and *Millepora complanata*. The primary  
69 project motivation is biotic i.e., to enhance coral reef biodiversity, while the secondary motivation is  
70 pragmatic i.e., to enhance the ecosystem services of fisheries, tourism and coastal protection by the  
71 local coral reefs. The specific project objectives are 1) to generate an annual stock of > 5,000 coral

72 fragments from four reef-building species per island; 2) to transplant 5,000 coral colonies per ha<sup>-1</sup> yr<sup>-1</sup>  
73 per island from year two of the project, for a total of 30,000 coral transplants over six hectares in three  
74 years; 3) to achieve a 25% increase in selected coral reef health indicators (i.e., live coral cover, coral  
75 settlement, fish biomass, and rugosity) at the intervened sites; 4) to design and implement an effective  
76 system of protection and restoration of intervened reef areas that encourages conservation and  
77 contributes to the sustainability of benefits derived from these reefs together with relevant social  
78 actors; and 5) to quantify the ecosystem services of intervened reef areas in current and future  
79 scenarios of intervention, variability and climate change. The project envisions a duration of four years  
80 of which year one was used for growing the initial coral stock in nurseries, year two was for the initial  
81 outplanting, year three is for stock maintenance, continued outplanting, and to start monitoring the  
82 intervened sites, and year four is for implementing a succession strategy. Nursery-grown corals as well  
83 as micro-fragments will be outplanted to the reef using a unique mix of marine cement and a colloid  
84 adjuvant to improve fluidity and reduce runoff [42]. Outplanting density will be 5,000 individuals per  
85 ha of reef. The total spatial extent is six hectares (area of outplant) by year four distributed over three  
86 hectares at each of the two islands. The total estimated budget is \$900,000 (2018 USD) resulting in an  
87 annual expenditure of \$37,500 (2018 USD) ha<sup>-1</sup> yr<sup>-1</sup>. The best guess of the estimated feasibility is 0.6  
88 (minimum of 0.5 and maximum of 0.9) based on the five specific project objectives. The first phase of  
89 the project was financed by all participating organizations with support from MasBosques and  
90 BanCO2. There is a large focus on educating, empowering and training local community members such  
91 as fishermen to maintain the coral nurseries and to continue to outplant coral fragments to the reef  
92 upon the project's end.

93

94 Country: Costa Rica

95 Location: Golfo Dulce

96 Organization: Raising Coral Costa Rica

97 The civil organization Raising Coral Costa Rica is located in Golfo Dulce, on the southern Pacific coast  
98 of Costa Rica, where it maintains a coral reef restoration project (8.635544° N, -83.286635° W). The  
99 project employs the techniques coral gardening and micro-fragmentation. For the coral gardening  
100 approach, coral fragments are often collected as corals of opportunity and are grown in tree and rope  
101 nurseries, after which they are outplanted to the restoration site (**Fig. 2f**). The project focuses on the  
102 main reef building corals of the Eastern Tropical Pacific (ETP) region: *Pocillopora* sp., *Porites evermanni*  
103 and *P. lobata*, and *Pavona gigantea*. Experimental work on a smaller scale is also targeted at *Pavona*  
104 *frondifera* and *Psammocora* sp. The primary motivation of the project is experimental with the  
105 rationale to improve coral propagation techniques for growing corals in the ETP, with an emphasis on  
106 answering questions of ecological concern. The secondary motivation is biotic; to enhance  
107 biodiversity, ecosystem connectivity, and ecological resilience. The specific project objectives are 1)  
108 to define the best coral propagation and restoration techniques; 2) to establish a coral restoration  
109 program in Costa Rica; 3) to facilitate coral reef research to improve restoration work; and 4) to  
110 integrate local communities into coral restoration projects. Raising Coral Costa Rica has been in  
111 operation for three years (2017 - 2019) but is planned for a minimum of 10 years in total (2017 - 2026)  
112 with the possibility of an extension. Branching corals grown in the nursery are outplanted onto the  
113 substrate with cable ties attached to large nails. Future endeavours will attach corals grown on ropes  
114 in rope-nurseries directly to the substrate without separating them from the ropes. Massive and  
115 encrusting corals are outplanted by drilling holes into the substrate and inserting the stem of ceramic  
116 plugs, which carry the coral fragments with a small amount of marine epoxy or cement. The project  
117 aims to restore 10 reef patches of 200-500 m<sup>2</sup> each within the next three years equalling a maximum  
118 intervened area of 0.5 ha. The total project cost over the last 2.5 years was \$120,000 USD. If in kind

119 support (such as accommodation, university technical support, volunteer time, etc.) is included, these  
120 costs would be 100% higher, i.e., a total of \$240,000 USD. The annual project budget was \$35,000 USD  
121 for 2018, which was mostly composed of salaries (\$15,000 USD) and logistics such as travel and boat  
122 rental (\$15,000 USD). The remaining \$5,000 were needed for material and consumables. The best  
123 guess of feasibility is around 0.8 (minimum 0.6 and maximum 0.9), and thus represents a high  
124 likelihood of reaching the specific project goals within the project duration. The coral species  
125 *Pocillopora* sp. has been restored with high success over the last few years. This species was nearly  
126 absent (potentially due to sedimentation) from Golfo Dulce at the onset of the project in 2017 and  
127 will be closely monitored for signs of sexual reproduction, which has so far been poorly monitored in  
128 Costa Rica. The project is mainly financed by private donations and Raising Coral Costa Rica is currently  
129 initiating a fundraising campaign call to restore several thousand corals for Costa Rica and to scale-up  
130 coral propagation and restoration efforts.

131

132 Country: Dominican Republic

133 Location: Bayahibe

134 Organization: Fundación Dominicana de Estudios Marinos, Inc. (FUNDEMAR)

135 The civil organization Fundación Dominicana de Estudios Marinos, Inc. (FUNDEMAR) oversees a coral  
136 reef restoration project located on the south-eastern side of the Dominican Republic (18.365881° N, -  
137 68.850397° W). The techniques coral gardening and larval propagation are used to restore local coral  
138 reefs. *Acropora cervicornis* is being restored by employing the coral gardening approach and rope  
139 nurseries (**Fig. 2b**) while *Diploria labyrinthiformis*, *A. cervicornis*, *A. palmata*, *Orbicella annularis*, *O.*  
140 *faveolata*, and *Colpophyllia natans* are being recovered by seeding coral recruits after cultivation.  
141 Coral larvae are reared both *in situ* using SCORE-designed floating pools (**Fig. 2c**) and *ex situ* in a wet  
142 lab. FUNDEMAR, in partnership with local and international partners, manages 8 *in situ* coral nurseries  
143 focused at the propagation of *A. cervicornis* corals in south-eastern of the Dominican Republic

144 (Bayahibe), and one nursery in Bavaro and another in Las Terrenas (**Table S1**, supplementary material).  
145 In the last evaluation done in 2019, FUNDEMAR hold a total of 1,873 *A. cervicornis* coral fragments in  
146 the 8 nurseries, corresponding 1,997 linear meters which had a 98% survivorship.  
147 The primary motivation of the project is biotic with the rationale of biodiversity enhancement. The  
148 secondary motivation is legislative focused on restoration after environmental impact and as a  
149 biodiversity offset. However, the project has also idealistic motivations for cultural, social and political  
150 reasons. The project has two major objectives: 1) to propagate coral tissue of the endangered *A.*  
151 *cervicornis* using the genetically diverse coral nurseries: estimated feasibility 0.8 (min of 0.5, max of 1)  
152 and 2) to enhance the coral reef's genetic diversity and resilience to environmental changes by  
153 outplanting 8,000 larval settlement bases (either SCORE's cement or ceramic substrates or  
154 FUNDEMAR's cement "cookies") per year: estimated feasibility 0.6 (min of 0.3, max of 0.8). The project  
155 started in 2011 and is a permanent institutional program. Corals grown in the underwater nursery are  
156 outplanted by cable ties, nails and using epoxy glue where necessary. FUNDEMAR has already carried  
157 out coral outplanting at 12 restoration sites (**Table S2**, supplementary material). The project is  
158 monitoring two spawning sites used to deliver the spawning stocks for rearing coral larvae in an *ex*  
159 *situ* facility (**Table S3**, supplementary material). Corals reared by larval propagation either settle  
160 naturally or structures with settled coral larvae are attached by epoxy glue or nails to the substrate.  
161 FUNDEMAR's restoration project aims to intervene one hectare of degraded coral reef per year on a  
162 restoration schedule of one coral colony per square meter, transplanting around 2,000 *A. cervicornis*  
163 coral fragments of around 20-30 cm in diameter and seeding 8,000 recruit substrates (from 3-5  
164 different species). FUNDEMAR is a largely self-sustainable organization that has developed strategic  
165 alliances with private and public national and international institutions and with financial support for  
166 implementation of new projects. The total project cost per year is around \$51,800 USD which includes  
167 costs for maintenance, staff salaries, boats, and keeping up the facility but excludes in-kind support  
168 from volunteers. Part of this funding (\$18,400 USD per year) comes from the local, national and

169 international alliances that FUNDEMAR has established. The coral reef restoration project has been  
170 financed by two grants and alliances with other organizations carrying out coral reef restoration.

171

172 Country: Dominican Republic

173 Location: Bayahibe

174 Organization: The Iberostar Group

175 Reef restoration is one of the main pillars of the *Wave of Change* movement initiated in 2018 by the  
176 international hotel chain Iberostar. *Wave of Change* aims at contributing to the conservation of the  
177 oceans by engaging with the tourism sector. Therefore, the Iberostar Group has three overarching  
178 goals: 1) to eliminate single-use plastics in more than 120 hotels; 2) to promote sustainable fishing  
179 through acknowledging seasonal closures for breeding and reproduction of fish stocks as well as to  
180 only offer seafood from certified sustainable providers on the menus; and 3) to contribute to coastal  
181 health through conservation of seagrass meadows, mangrove forests and coral reefs. Although the  
182 goals of this movement are on a global scale, some actions are implemented differently depending on  
183 the specific location. So far, reef restoration has only been initiated in the Dominican Republic,  
184 although the Iberostar Group envisions scaling-up efforts in other locations in the Caribbean, currently  
185 in progress for Mexico in collaboration with the CINVESTAV group (see projects in Mexico). The  
186 Iberostar Group uses the coral gardening technique to restore coral reefs and is currently in charge of  
187 two coral nurseries at two locations in the Dominican Republic. One of the nurseries is an *in situ*  
188 nursery and the other one is an *in situ* nursery connected to a land-based facility for research and to  
189 evaluate the genetic diversity of corals in the nursery. The overall purpose of these two nurseries is to  
190 contribute to reef restoration practices by focusing the efforts on enhancing genetic and species  
191 diversity, and by identifying individuals that could be better suited to withstand thermal stress and  
192 hence climate change into the future. The six specific objectives of this project at the two coral reef  
193 restoration locations (Iberostar in the Bayahibe village and Iberostar Bavaro Hotel) are summarised in



194 **Table S4** (supplementary material). The main motivations of this project are experimental, biotic and  
195 idealistic. So far, there is no estimated duration of the restoration project, as it is still being developed  
196 under the *Wave of Change* movement. Likewise, no information on the spatial extent of area  
197 intervened is available yet, because the transplantation strategy is currently being developed. As part  
198 of this strategy, the group aims to identify coral genotypes potentially less susceptible to  
199 environmental stress.

200 From 2016 onwards, the group has taken over the responsibility of an *in situ* coral nursery that was  
201 set up and maintained in collaboration with the Fundación Dominicana de Estudios Marinos, Inc.  
202 (FUNDEMAR). This nursery is located in the southeast of the country, close to the Bayahibe village,  
203 and in front of the Iberostar Hotel at this location (18.339088° N, -68.826408° W). It has been placed  
204 on a sandy patch surrounded by a coral reef. The overall nursery consists of 12 structures of which  
205 three are rope nurseries, three are metal frames, one is a metal table, and five are coral nursery trees.  
206 In 2019, the *in situ* nursery produced 342 *A. cervicornis* fragments corresponding to 408 linear meters  
207 of coral tissue with 96% survivorship.

208 The final goal of the project is to transplant nursery-grown corals to the reef. However, because the  
209 current efforts are focused on expanding the number of coral nursery trees and enhancing intra- and  
210 interspecific diversity, so far, the restoration sites, number of transplants or project duration have not  
211 been formalised yet. The main species used in the nursery is *A. cervicornis*, although more species will  
212 be added on the longer term to address interspecific diversity. Focal species for restoration are  
213 *Diploria labyrinthiformis*, *Porites porites*, *P. astreoides*, *Orbicella annularis*, *O. faveolata*, *Agaricia*  
214 *agaricites*, and *A. palmata*. The interspecific diversity is being addressed through genetic analyses in  
215 collaboration with the University of California at Santa Barbara.

216 To support scientific restoration efforts and accomplish the specific objectives summarised in **Table**  
217 **S4** (supplementary material), a land-based facility is currently under construction at the Iberostar  
218 Bavaro Hotel (18.713228° N, -68.450172° W). This land-based facility will support the project by  
219 keeping a genetic bank of the coral species present in the *in situ* nursery and ensure that the unique

220 coral genotypes are protected from storms and hurricanes, and are thus preserved into the future.

221 The land-based facility will enable research to carry out experiments that allow for a characterization

222 of coral individuals based on their stress tolerance to heat. Research will be carried out by the scientific

223 team of *Wave of Change* as well as by collaborating with international scientists who can use the

224 facility to conduct their studies. Finally, the facility will be used as an outreach centre to teach and

225 raise awareness about topics such as coral biology, the importance of reefs, threats to marine

226 ecosystems, etc. to hotel clients and staff. Therefore, audio-visual resources, informative signs, and

227 entertainment activities will be implemented. Despite the nursery still being developed, fragments of

228 *A. cervicornis*, *P. porites* and *A. agaricites* have been maintained with 100% survival rate for three

229 months to date. All these efforts will contribute to more efficient restoration practices to guarantee

230 higher resilience of future restored reefs. Within this project, there is also a commitment to involve

231 the local community. For this purpose, two local fishermen have been hired and trained to help

232 maintain the *in situ* nursery to achieve the biodiversity goals. Their actions and personal motivation

233 to protect the ocean will make them role models for the rest of the community.

234 The estimated budget spent from the beginning of the project in May 2018 to March 2019 is \$100,000

235 USD, including materials and construction of the land-based facility and salaries. In 2018 alone,

236 \$40,000 USD were spent on construction (excluding salaries). The project is privately financed with

237 annual funds destined to the *Wave of Change* initiative. **Table S4** (supplementary material)

238 summarises the estimated feasibility of the six specific objectives of the projects (mean best guess:

239 0.5 with a min of 0.2 and max of 0.8). A high feasibility is considered for the shorter-term objectives

240 of both the land-based facility and the *in situ* nursery, due to the resources available and the recorded

241 survival of the corals in both nurseries. Longer term objectives such as enhancing resilience of restored

242 reefs through biodiversity approaches are considered at medium feasibility, due to the uncertainty of

243 the factors involved in the process.

244

245 Country: Dominican Republic

246 Location: Punta Cana

247 Organization: Fundación Grupo Puntacana

248 The Fundación Grupo Puntacana (FGPC) was founded in 1994 to conserve and protect the natural  
249 resources of Punta Cana and to contribute to the sustainable development of the Dominican Republic.

250 The projects and programs of the foundation are aimed at finding practical solutions to some of the  
251 local environmental issues related to marine ecosystems and sustainable development. Recently,  
252 FGPC inaugurated its Centre for Marine Innovation to lead all of its marine conservation projects  
253 including the coral reef restoration program, which hosts the largest *in situ* and the first *ex situ* coral  
254 nursery in the Dominican Republic. The nursery is located at 18.539195° N and -68.347447° W. The  
255 program applies two techniques to restore local coral reefs: since 2005 coral gardening has been used  
256 while micro-fragmentation has been implemented since 2017. The coral gardening program is mainly  
257 focused on the threatened coral *A. cervicornis* but also includes *A. palmata*. Soon, other species such  
258 as *Orbicella* spp., *Porites* spp., and *Pseudodiploria* spp. will be incorporated. Currently, over 1,500  
259 linear meters of *A. cervicornis* tissue are being propagated at the *in situ* nursery and 12 unique  
260 genotypes are being tracked since 2011. These represent about 1,300 corals with a diameter of  
261 approximately 1.2 m.

262 Nursery fragments are grown on A-Frames [19], tables and ropes at water depths between 3.5 and 5  
263 m. The primary motivation of the project program is biotic and is focused on the enhancement of  
264 biodiversity. The secondary motivation is idealistic and concentrates on social reasons (e.g.  
265 development of alternative income opportunities for local communities and improved user  
266 experience for tourism, etc.). The specific program objectives are: 1) to prevent a potential local or  
267 regional disappearance of coral species through enhancement of successful sexual reproduction using  
268 fast growing, genetically diverse, nursery-reared fragments; 2) to reduce local environmental  
269 problems such as marine pollution, unsustainable wastewater treatment, uncontrolled fisheries and

270 tourist carrying capacity; 3) to train local community members such as fishermen or dive centre staff  
271 in the installation and maintenance of coral nurseries and outplanting of nursery-grown corals; 4) to  
272 replicate the lessons learned in other parts of the Dominican Republic and other Caribbean island  
273 nations to improve coral reef restoration in Punta Cana; and 5) to generate alternative income  
274 opportunities for members of the local community, especially for local fishermen. The Fundación  
275 Grupo Puntacana has two programs in place, one of which uses the coral gardening technique and the  
276 other one employs the micro-fragmentation approach.

277 Program 1: Nursery fragments are outplanted on the local, patchy, fringing reef using cable ties and  
278 galvanized nails at similar depths to fragments growing in the nursery. Since 2014, a total of 8,810 *A.*  
279 *cervicornis* fragments (representing 5,394 linear meters of coral tissue) have been transplanted over  
280 almost 0.44 ha of degraded reef. Sexual reproduction has been consistently observed at both the  
281 nursery and surrounding outplanted sites. The total estimated budget for 2018 was around \$93,000  
282 USD resulting in \$211,363 USD ha<sup>-1</sup> yr<sup>-1</sup> when extrapolated from the actual area intervened (0.44 ha).  
283 This budget includes salaries, material, equipment, consumables, fixed-assets, infrastructure upkeep,  
284 and project-related expenses. For the next 3 years (2019 – 2021), if grant proposals submitted are  
285 approved, there is a plan to scale-up coral reef restoration efforts. These include an increase in the  
286 number of *A. cervicornis* fragments outplanted to approximately 5,000 fragments per year. FGPC  
287 estimates that over the next 3 years about 15,000 fragments can be transplanted over one ha of  
288 natural coral reef. The total estimated budget for the time interval 2019 – 2021 will be approximately  
289 \$950,000 USD, thus equalling the total cost of \$313,500 USD ha<sup>-1</sup> yr<sup>-1</sup>. The best guess of the estimated  
290 feasibility for reaching the five project objectives is 0.8 (minimum of 0.5 and maximum 0.9), if grant  
291 proposals submitted are approved.

292 Program 2: The micro-fragmentation program is currently focused on the species *Pseudodiploria*  
293 *strigosa*, *P. clivosa*, *Porites astreoides*, and *P. furcata*. However, the project envisions including  
294 *Orbicella annularis* and *Montastraea cavernosa* as well as a couple of other species. The donor  
295 colonies (fragments of opportunity) are cut by a diamond band saw into approximately one cm<sup>2</sup>

296 pieces, which are then attached to cement discs made in-house and deposited into flow-through  
297 raceways. This program consists of three phases. The first phase identified the best conditions for high  
298 survival and fast growth of the micro-fragments in the *ex situ* nursery and developed the protocols for  
299 the approach. This phase is complete. The second phase, beginning in 2019, will identify adequate  
300 restoration sites and develop outplanting protocols. During this second phase, methods, tools and  
301 equipment will be tested. The third phase will scale-up outplanting efforts with micro-fragments. By  
302 the end of the third phase, an estimate of 5,000 micro-fragments will be outplanted annually using  
303 established protocols, covering up to 200 m<sup>2</sup> per year. The primary motivation of this project program  
304 is biotic (biodiversity enhancement), while the secondary is experimental (improve restoration  
305 approach, technology and methods). A tertiary motivation is idealistic (environmental education and  
306 outreach for the local community and tourists). The total budget for 2018 was around \$30,000 USD.  
307 The project duration is three years and the total estimated budget is \$850,000 USD (pending grant  
308 approvals). The best guess of the estimated feasibility for program 2 is 0.6 (minimum of 0.4 and  
309 maximum 0.9). Both programs have the same specific objectives.

310 The coral reef restoration programs are supported by the general budget of Fundación Grupo  
311 Puntacana. Additional support is provided by private donations, national and international grants and  
312 institutions such as Deutsche Gesellschaft für Internationale Zusammenarbeit (GIZ), The Nature  
313 Conservancy (TNC), Counterpart International (CPI), Caribbean Hotel and Tourism Association, Global  
314 Giving, and InterAmerican Development Bank (IDB) among others.

315

316 Country: Mexico

317 Location: Chetumal

318 Organization: Oceanus A.C.

319 Oceanus A.C. is a Mexican non-governmental organization (non-profit) based in Chetumal, in the state  
320 of Quintana Roo, that develops projects for coral reef conservation. Its mission is to develop and apply

321 techniques that enhance coral reef resilience, implement conservation interventions and promote the  
322 sustainable use of coastal and marine resources. Together with its partners, Oceanus A.C. has designed  
323 and implemented a Coral Reef Restoration Program for the reefs of the Gulf of Mexico and the  
324 Mexican Caribbean. This program focuses on increasing the adaptation and recovery potential of coral  
325 reefs living at the reef crest through the establishment of rehabilitation sites. This project uses the  
326 coral gardening approach where corals are grown in *in situ* nurseries. The primary motivation of this  
327 program is pragmatic i.e., to recover reef ecosystem health and promote recovery of environmental  
328 services of the reef as well as associated species populations and biomass with special emphasis on  
329 recovering protected and no-take areas. The secondary motivation is legislative, i.e., to restore coral  
330 reefs after environmental impacts such as ship-grounding or hurricanes depending on the location  
331 and site.

332 Between 2009 and 2018, the activities of Oceanus A.C. have focused on the rehabilitation of sites with  
333 *Acropora palmata* as a key reef building species. The habitat targeted was the reef crest because it  
334 dissipates 86% of wave energy and has an important role in coastal protection [43]. In 2019, the  
335 program plans to extend its efforts to other habitats such as the back reef and coastal reefs and to  
336 add other species of *Acropora* spp. and other genera according to their preferred environment (*A.*  
337 *cervicornis*, *A. prolifera*, *Porites* spp., *Agaricia* spp., *Orbicella* spp., and *Diploria* spp.). The main  
338 restoration techniques include coral gardening, which involves the construction and installation of  
339 coral nurseries for stabilization of fragments of opportunity rescued from donor areas. Thousands of  
340 colonies grown in these nurseries are being outplanted to the reef each year by first attaching small  
341 concrete bases to the reef and then fixing corals from the nurseries to these structures (**Fig. 2d**). To  
342 increase the diversity at the restoration sites and promote natural resilience to climate change and  
343 local stressors, the program identifies the genetic material (genotypes) from healthy donor  
344 populations using the microsatellite technique [44]. At least five genotypes are combined at each  
345 restoration site. The program also seeks to engage local communities, service providers such as diving  
346 shops, hoteliers and managers to build local restoration groups and form a restoration network that

347 helps increase restoration efforts along the Mesoamerican Reef. Establishing this network and  
348 applying different restoration strategies depending on the local stakeholder involved is envisioned to  
349 allow the program to become self-sustainable in the long term.

350 The program has three specific objectives: 1) to promote the rehabilitation of coral reefs through  
351 transplantation of 10,000 colonies every year at different sites in the Gulf of Mexico and the Mexican  
352 Caribbean; 2) to strengthen the resilience and adaptation potential of coral reefs by increasing  
353 diversity on restoration sites through the identification of genetic material from healthy donor  
354 populations that could be naturally resilient to climate change and local stressors; and 3) to secure  
355 community and reef managers' engagement to build local restoration groups that work based on a  
356 self-sustainable strategy to multiply efforts, increasing benefits to local communities in the short and  
357 mid-term as well as helping the activities of the program to be maintained for a longer term. Currently  
358 (2018-2019), several locations for coral reef restoration are being developed by the program: at  
359 Veracruz, Xcalak, Playa del Carmen, Puerto Morelos, Sian Ka'an and just recently at Cozumel (see **Table**  
360 **S5**, supplementary material for all restoration sites). The restoration sites are selected according to a  
361 set of established criteria. Every new site requires between three and five years of work until colonies  
362 of the first and second generation have grown to reproduce sexually. Every year, monitoring is carried  
363 out before and after transplantation at each of the sites to evaluate the survival and growth of  
364 restored corals. The overall average of transplant survival has been about 80%. At the oldest  
365 restoration sites initiated from 2013 onwards and maintained by the program, the outplanted coral  
366 fragments, which initially had average sizes of between 7 and 10 cm, have now (in 2019) grown to an  
367 average size of 30 cm in diameter. Some outplants have reached a diameter of up to 110 cm (**Fig. 2e**).  
368 About 30% of the transplants evaluated in 2019 at all sites had a size of 20 cm in diameter on average  
369 indicating that they have reached a reproductive size [45].

370 The restoration work of Oceanus A.C. is mainly artisanal and requires intensive maintenance to  
371 achieve results. Therefore, restoration efforts can only be sustained if the local community is involved  
372 to guarantee restoration success. The restoration program has initiated the formation of local

373 restoration groups mainly consisting of members of the local fishing communities and other local  
374 organizations as well as the private sector (e.g., hotels) to support the restoration efforts. The  
375 formation of these groups also allows for increasing the local capacities by involving volunteers and  
376 visitors in the restoration activities. Therefore, Oceanus A.C. has designed a certification for  
377 'Restoration Program Guides'. To be certified, interested participants must formally register and  
378 commit to the restoration project. The vision is to maintain the restoration activities at those sites  
379 while having the support of local groups who increase the awareness of visitors and volunteers on the  
380 importance of the program for local coral reefs. Within these activities, options for funding are sought  
381 for every local restoration group to achieve self-sustaining restoration efforts at each site over the  
382 long term. The main partners of Oceanus A.C. for the development and scaling-up of the program have  
383 been the Comisión Nacional de Áreas Naturales Protegidas (CONANP), Summit Foundation, the  
384 Mesoamerican Reef Fund, Fairmont Mayakobá and OHL Group, with local partners such as Acuario de  
385 Veracruz, Fundación de Parques y Museos de Cozumel, hotels from Playa del Carmen (Mayakobá  
386 chain) and from Mahahual and Xcalak, the Xcalak community, and tourist services providers from  
387 Cozumel, Puerto Morelos and Veracruz.

388 The total project budget was estimated to average \$150,000 USD per year since 2014 to outplant  
389 10,000 colonies every year with an outplanting schedule of one coral colony per square meter.  
390 Therefore, the annual budget was estimated at \$150,000 USD ha<sup>-1</sup> yr<sup>-1</sup>. The spatial extent of total area  
391 intervened for all restoration activities since 2014 is estimated as 6.3 ha to date. The best guess of  
392 feasibility to reach the three project objectives based on the project's experiences with local  
393 stakeholders is around 0.8 (minimum 0.5 and maximum 0.9).

394



395 Country: Mexico

396 Location: Mexican Caribbean

397 Organization: Universidad Nacional Autónoma de México, Integrative Reef Conservation  
398 Research Laboratory (CORALIUM)

399 The Integrative Reef Conservation Research Lab (CORALIUM), based at the Universidad Nacional  
400 Autónoma de Mexico (UNAM) campus in Puerto Morelos, Mexico, undertakes science-based research  
401 to promote and scale-up best practices for coral restoration using sexual recruits (experimental  
402 motivation) and to increase genetic diversity in restoration efforts in the face of global climate change  
403 (biotic motivation). Specifically, CORALIUM's objectives are 1) to reduce costs of techniques using  
404 larval propagation of corals 100-fold; 2) to conduct research to improve survivorship of sexual recruits  
405 20-fold; and 3) to scale-up coral restoration techniques to ecologically significant scales over a 10-year  
406 period. To achieve these objectives, CORALIUM collaborates with national and international  
407 researchers, NGOs, businesses and works closely with the Mexican Commission for Natural Protected  
408 Areas.

409 Since 2007, CORALIUM has been studying the basic biology of coral reproduction with the production  
410 of sexual recruits for restoration efforts beginning in 2011. Subsequently, it has focused on the  
411 development of low-cost techniques to scale-up the production of coral sexual recruits. This involves  
412 gamete collection in the wild, assisted fertilization and embryo husbandry in *ex situ* aquaria followed  
413 by outplanting of the sexual recruits to degraded reef sites. Restoration trials involve outplanting  
414 sexual recruits produced annually in the laboratory since 2011. From 2011 to 2014, the recruits were  
415 grown to juvenile size (up to 10 cm maximum diameter) in *ex situ* aquaria located in the Xcaret  
416 Ecopark. These colonies are now sexually mature as evidenced by the production of gametes in 2019.  
417 Since 2014, the research, in collaboration with SECORE International, has focused on scaling-up  
418 production and reducing costs by outplanting sexual recruits at the one polyp stage settled onto  
419 tetrapod-shaped substrates, designed by SECORE International. Although the production and

420 outplanting of sexual recruits of *Acropora palmata* have been the focus, CORALIUM has also  
421 successfully worked with other important reef-building corals including *Orbicella faveolata*, *O.*  
422 *annularis*, *Diploria labyrinthiformis*, and *Pseudodiploria strigosa*.

423 CORALIUM, in collaboration with SECORE International and Experiencias XCARET Aquarium have  
424 outplanted coral sexual recruits with sizes ranging from one polyp to colonies with an estimated  
425 volume of 500 cm<sup>3</sup> on eight degraded reefs along the Mexican Caribbean from Cancun to Xcalak (**Table**  
426 **S6**, supplementary material). In total, the area of outplants corresponds to 0.15 hectares. To reduce  
427 costs, coral larvae are settled onto the artificial substrates and outplanted two weeks post-settlement  
428 (one-polyp stage). The substrates are placed manually into natural gaps formed by the reef framework  
429 without using cement or resin. New substrate designs are in the process of being tested to increase  
430 recruit survival from 0.1% at one-year post-settlement currently to a target of 10% and to improve  
431 substrate retention in the reef framework. The costs for the production and outplanting of sexual  
432 recruits between 2014 and 2018 is estimated at \$15,000 USD per year and equals \$100,000 USD ha<sup>-1</sup>  
433 yr<sup>-1</sup>. The best guess of feasibility for reaching CORALIUM's objectives within 10 years is around 0.7  
434 (minimum 0.6 and maximum 0.9). CORALIUM's research and restoration efforts have been funded by  
435 Universidad Nacional Autónoma de México, Comisión Nacional de Áreas Naturales Protegidas,  
436 Consejo Nacional de Ciencia y Tecnología, Comisión Nacional para el Conocimiento y Uso de la  
437 Biodiversidad, Alianza World Wildlife Fund – Fundación Carlos Slim, SECORE International, The Nature  
438 Conservancy and Experiencias XCARET.

439 Through communication and outreach, CORALIUM has promoted the message that coral reef  
440 conservation efforts and adaptive protected areas management are key to any coral restoration  
441 efforts. In collaboration with SECORE International and The Nature Conservancy, CORALIUM has  
442 implemented an annual coral reproduction course focused at students, coral restoration practitioners  
443 and other stakeholders. One of the most important results of this capacity-building practice has been  
444 the creation of a network throughout the Caribbean to scale-up coral restoration on a wider level: this  
445 includes Expedition Akumal (Akumal, Mexico), Cozumel Coral Reef Restoration (Cozumel, Mexico),

446 Mexican Fisheries Department (Puerto Morelos, Mexico), the University of Belize (Calabash Caye,  
447 Belize), FUNDEMAR (Punta Cana, Dominican Republic) and the National Aquarium of Cuba (Cuba) who  
448 have included larval propagation techniques into their restoration programs. In the near future,  
449 programs are also expected to be developed in Colombia and Costa Rica. Additionally, CORALIUM has  
450 produced educational material such as technical manuals [31, 46], and informational guides and  
451 pamphlets about the reproductive biology of corals and coral restoration.

452

453 Country: Puerto Rico

454 Location: Culebra Island

455 Organization: Sociedad Ambiente Marino, Community-Based Coral Aquaculture and Reef  
456 Rehabilitation Program - Hope for the Reef

457 In 2003, the non-governmental organization Sociedad Ambiente Marino (SAM), in collaboration with  
458 the Culebra Island Fishers Association, Coralations, Caborrojeños Pro Salud y Ambiente, and the  
459 University of Puerto Rico (UPR), launched the Community-Based Coral Aquaculture and Reef  
460 Rehabilitation Project in Culebra Island. The island community is located 27 km off northeast Puerto  
461 Rico, in the northeast of the Caribbean Sea. The program has undergone major adaptations as a result  
462 of impacts related to adverse environmental factors. These include localized runoff impacts, sea  
463 surface warming and mass coral bleaching (2005), and multiple category five hurricanes. For instance,  
464 hurricanes Irma and María in September 2017 nearly wiped out the entire project and eliminated over  
465 60,000 outplanted colonies [47]. This major impact of environmental factors led to the  
466 implementation of adaptive management and change in the maintenance of coral nurseries. In the  
467 beginning, three original coral nursery sites were located at Bahía Tamarindo (BTA) (18.315272° N, -  
468 65.318129° W), Punta Melones (PME) (18.305053° N, -65.312645° W) and Punta Soldado (PSO)  
469 (18.280184° N, -65.287553° W). The original nurseries consisted of plastic-covered wire mesh cages,

470 which were followed by line nurseries. Line nurseries were more successful for the restoration sites  
471 [48]. A total of 15 different methods have been tested through the project, including a wide variety of  
472 benthic (i.e., plastic-covered wire mesh arrays, “A” frames, PVC frames, PVC habitat structures, wire  
473 mesh cylinders) and floating coral nurseries (i.e., table-line nurseries, and tree nurseries). The sites  
474 BTA, PME, and PTC are located within the Canal Luis Peña no-take Natural Reserve. PSO is open to  
475 fishing. The original nurseries were located over sandy or rubble bottom at a water depth of 3-5 m.  
476 The PME site was abandoned in 2005 following a massive coral bleaching event. Coral bleaching in  
477 combination with increased runoff from adjacent construction sites along the coast resulted in major  
478 coral mortality at this site. Following the massive coral bleaching event, the coral nurseries at PSO  
479 were relocated to a depth of 6-8 m. Coral nurseries were re-established at PME in 2011 but were  
480 eliminated again in 2013 after storm swells and runoff significantly impacted the location in 2011 and  
481 2012 [48]. Following impacts by hurricanes Irma and María in 2017, tree coral nurseries at BTA were  
482 established at a depth of 9 m. Additional tree nurseries were established at Punta Tamarindo Chico  
483 (PTC) (18.310547° N, -65.317597° W) at a depth of 6-8 m, and at PSO at a depth of 7-12 m, to prevent  
484 further damage from coral bleaching and storm swells. At this stage and after post-hurricane  
485 reconstruction of coral nurseries, the project was renamed *Hope for the Reef* (‘Esperanza para el  
486 Arrecife’). Coral nurseries have been historically managed by SAM, and since 2011, in direct  
487 collaboration with the Centre for Applied Tropical Ecology and Conservation (CATEC) of the University  
488 of Puerto Rico – Río Piedras Campus, under a memorandum of agreement with the Puerto Rico  
489 Department of Natural and Environmental Resources (PRDNER), and NOAA Restoration Centre  
490 (NOAA-RC).

491 The project mostly employs the technique coral gardening, where fragments of the species *A.*  
492 *cervicornis* and *A. palmata* are grown in tree nurseries to date. Floating units have been located at a  
493 water depth between 4 to 10 m. Recent major hurricane impacts led to the generation of multiple  
494 fragments of opportunity. Additional species are now grown in the nurseries including *Dendrogyra*  
495 *cylindrus*, *O. annularis*, *O. faveolata*, *Madracis aurentenra*, *Porites divaricata*, and *Eusmilia fastigiata*.

496 Micro-fragmentation methods and direct coral cuttings have also been employed since the recent  
497 expansion. Direct transplantation has been conducted for emergency outplanting of fragments and/or  
498 detached colonies generated by vessel groundings, winter swells or hurricanes. Overall, in the time  
499 span of 2003-2017 approximately 60,000 coral colonies (mostly *A. cervicornis*) were harvested and  
500 outplanted to coral reefs in Culebra Island. The project has intervened an area of ca. 6 ha.

501 The primary motivation of the project is biotic (i.e., to enhance biodiversity, coral reef connectivity  
502 and ecosystem resilience). The secondary motivation is experimental (i.e., testing alternative methods  
503 and designs, with aims to answering ecological research questions). The tertiary motivation is  
504 pragmatic (i.e., enhance the ecosystem services by improving shallow-water essential fish habitat,  
505 restoring depleted fisheries, enhancing carbon sequestration, tourism, and coastal protection of local  
506 coral reefs). Also, an important local motivation is to restore coral reef ecological functions within  
507 areas formerly impacted by military training activities [47, 48]. Finally, the project is motivated by an  
508 idealistic rationale due to cultural reasons (i.e., community-based aim to restore formerly bombarded  
509 grounds by the U.S. Navy which used local coral reefs in Culebra Island to support naval training  
510 activities between 1901 and 1975, rescue and stewardship of local coral reefs) and due to social  
511 reasons (i.e., fostering increased community involvement, job creation, nature education,  
512 environmental outreach, hands-on training in coral farming and reef rehabilitation methods). More  
513 recently, the project is being motivated by legislative reasons (i.e., restoration of *A. palmata* and  
514 *A. cervicornis* as part of mitigatory compensation project).

515 After the impacts on the restoration sites caused by category five hurricanes Irma and María in 2017,  
516 the original project objectives were modified to the following: 1) to expand the annual stock in the  
517 nurseries of *A. cervicornis* to 8,000 colonies, of *A. palmata* to 2,500 colonies, *D. cylindrus* to 500  
518 colonies, and *O. annularis* to 500 colonies; 2) to restore approximately 3 ha of degraded reef per year  
519 till 2022; 3) to outplant a minimum total of 20,000 colonies of four species grown in the nurseries by  
520 year 2022, including 13,300 colonies of *A. cervicornis*, 5,000 colonies of *A. palmata*, 1,200 colonies of  
521 *D. cylindrus*, and 500 colonies of *O. annularis*; 4) to achieve a 25% increase in selected coral reef health

522 indicators (i.e., live coral cover, fish biomass, and rugosity) at intervened sites for *A. cervicornis* and *A.*  
523 *palmata*; 5) to design and implement an effective community-based plan for the rehabilitation of  
524 intervened reef areas, which encourages conservation and rehabilitation of ecosystem functions, and  
525 to contribute to the sustainability of the benefits of coral reefs; and 6) to quantify the ecosystem  
526 services of intervened reef areas in current and future scenarios of intervention, variability and climate  
527 change. This will be achieved by combining traditional *in situ* low-tech coral gardening, but also by  
528 incorporating micro-fragmenting and cuttings of outplanted corals in order to increase the number of  
529 outplanted colonies. In addition, the production of additional peer reviewed publications is also a  
530 paramount goal for SAM which goes beyond this project.

531 The post-hurricanes project phase envisions a duration of ~20 years, divided into sub-projects of four  
532 years each, of which year one is used for growing the initial coral stock in nurseries, year two is for  
533 stock maintenance and for the initial outplanting, year three is for stock maintenance, continued  
534 outplanting to additional locations, and to start monitoring at the intervened sites, and year four is for  
535 implementing the sustainability strategy, renewing coral nursery structures, rotating locations, micro-  
536 fragmenting or using cuttings of corals to improve the number of outplants, and/or moving forward  
537 to other locations.

538 Nursery-grown corals, fragments of opportunity of multiple species, as well as micro-fragments and  
539 cuttings are directly outplanted to the reef using Portland marine cement mixed with lime to  
540 neutralize pH. Cable ties and masonry nails are also used in the case of *A. cervicornis*. An outplanting  
541 schedule with a density of one individual per square meter of reef for *A. cervicornis* and of one colony  
542 per four square meters for other species is often followed. The total spatial extent intervened through  
543 the previous stages of the project was 6 ha, but many of these corals were lost during the 2017  
544 hurricanes. The projected spatial extent of reef rehabilitation by year 2022 in total will be 8.4 ha, with  
545 a potential to increase the area intervened to 11.7 ha depending on funding and on community-based  
546 volunteer support. The funds projected towards restoration for the period of 2019 to 2022 are  
547 \$1,327,206 (2018 USD), resulting in \$158,189 USD per restored ha per year or an estimated

548 investment of \$50.26 USD per coral colony. These figures are based on the direct funds spent without  
549 accounting for in-kind contributions from the community. The real total estimated budget (including  
550 community-based in-kind support) for the period of 2019 to 2022 is \$2,311,280 (2018 USD) resulting  
551 in a total annual expenditure of \$275,480 (2018 USD) ha<sup>-1</sup> or a total estimated expense of \$87.53 per  
552 coral colony. The best guess of the historical (2003-2017) estimated feasibility is 0.9 (minimum of 0.5  
553 and maximum of 1.0) based on the 6 specific project objectives. The first 14 year-long phase of the  
554 project was financed by multiple sources, including US Federal funding and minor funding from private  
555 sources. It also involved extensive volunteer work, even from SAM's staff. The conservative estimate  
556 is that approximately 80% of the work conducted between 2003 and 2017 was constituted by in-kind  
557 donations from project staff and community-based volunteers, particularly for the first 8 years of the  
558 project. There was also a large focus on community-based outreach, education, empowerment and  
559 hands on training of local community members such as students, divers and fishermen to maintain  
560 the coral nurseries and continue to outplant coral fragments to the reefs. Trained volunteer  
561 participation has exceeded 600 persons through the history of the project.

562 The best approximation of the current projected short-term (2019-2022) feasibility is 0.7 (minimum  
563 of 0.5 and maximum of 0.9) based on the six specific project objectives. The first 4-year sub-project of  
564 the post-hurricane long-term phase of the project will be financed through multiple sources, as  
565 described above. It will also involve extensive volunteer work, through a combination of strategies  
566 involving students, fishermen, NGOs, and an internship program. SAM also plans to involve the  
567 hospitality sector. There will also be a large focus on a combination of outreach, educational and hands  
568 on strategies to prepare the next generation of coral farmers and coral reef restoration researchers in  
569 Puerto Rico.

570

571 *Planned work*

572 Country: Colombia

573 Location: Gorgona National Natural Park, Colombian Pacific

574 Organization: La Fundación para la Investigación y Conservación Biológica Marina

575 ECOMARES (Universidad del Valle, Universidad Javeriana de Cali, and Gorgona National

576 Natural Park)

577 Since 2015, studies have been carried out within Gorgona National Natural Park, an island located in

578 the Pacific coast of Colombia, at approximately 28 km from the mainland (2.9694444° N, -

579 78.18472222° W). At present, Pacific Colombian coral reefs are in good condition, with only a few signs

580 of degradation, therefore there is no need for coral restoration yet. Acknowledging that Gorgona's

581 reef are going to have the same fate as all other reefs suffering from climate change, overfishing,

582 pollution, coastal development, bleaching and diseases, in 2015 a coalition of different institutions

583 was built to gather scientific information on coral restoration. The coalition is motivated by

584 experimental reasons to improve restoration approaches for their use at Gorgona National Natural

585 Park and explore sites that would be best suited for future restoration. Coral reefs in the area are built

586 and dominated by the branching coral *Pocillopora damicornis* and 90% of the studies have focused on

587 this species. The other species studied is the massive coral *Pavona clavus*, which is usually found in

588 deeper areas. The patch reefs of Gorgona hold a high biodiversity and abundance of fish and benthic

589 invertebrates, although the corals are quite dispersed and isolated from other colonies and reefs

590 (Pizarro V., personal observation). Some of the objectives of the studies have been: 1) to determine

591 the feasibility of coral nurseries in the area; 2) to determine the minimum coral fragment size of *P.*

592 *damicornis* for successful survival and growth in a coral nursery; 3) to find the optimal fragment size

593 for outplanting in terms of survival and coral growth; 4) to determine the effect of fish predation on

594 *P. damicornis* during the outplanting; and 5) to evaluate the use of enriched substrates for the massive



595 coral species *P. clavus*. So far, the duration for each study has been on average 1.5 years. However,  
596 this group expects to have projects running over the next 3 – 5 years depending on the coral species:  
597 three branching coral species and five massive coral species for future coral reef restoration. The  
598 group's expertise in outplanting has been focused towards *P. damicornis*. For this coral species,  
599 Portland cement mixed with sand and freshwater was used. So far, no information is available to  
600 determine the spatial extent (area) of restored habitat that will be obtained. The cost for running the  
601 projects have been lower than expected because they are mostly experimental and have not carried  
602 out formal coral reef restoration activities yet. In 2018 the budget was \$10,000 USD. Preliminary  
603 results have shown that coral restoration at Gorgona National Natural Park are feasible (best guess of  
604 0.7 with minimum of 0.5 and maximum of 0.9) and success can be achieved in only a few years (i.e., 3  
605 – 5) due to the rapid growth of *P. damicornis*.

606

607 Country: Mexico

608 Location: Cozumel National Natural Park & Mexican Caribbean

609 Organization: The Iberostar Group and CINVESTAV Group: Ecology and Coral Reef  
610 Ecosystems Laboratory

611 Cozumel Island (20.314565 N, -87.030132 W) is part of the Mesoamerican Reef System, the second  
612 largest barrier reef in the world, at over 1,000 km from Mexico to northern Honduras. Cozumel is  
613 located 18 km from the east coast of the Yucatan Peninsula in the northwest of the Caribbean and is  
614 46 km long and 16 km wide. Cozumel is surrounded by 11,987 hectares of coral reef which is part of  
615 the Cozumel National Natural Park. Annual monitoring is carried out within this reef with data  
616 available from 2004 until the present. Biological monitoring has identified six reef types between a  
617 depth of 10 m and 15 m. Some of those reefs are under local threat by increased tourism on the island.  
618 Both the local coral reefs as well as the species have been monitored, which is crucial for the  
619 implementation of coral reef restoration programs. Although the Healthy Reefs for Healthy People

620 Initiative declared the reefs of Cozumel to be in a healthy state [50], since December 2017,  
621 Scleractinian Coral Tissue Loss Disease (SCTD) has been encountered on the reef as one of the main  
622 threats to the reefs in the Cozumel and Mexican Caribbean region. The Iberostar Group and  
623 CINVESTAV Group have recently started a collaboration with the Cozumel National Natural Park and  
624 the Mexican Secretariat of Environment and Natural Resources (SEMARNAT) to implement a  
625 comprehensive coral reef restoration program for the island and other potential sites in the Mexican  
626 Caribbean, there is no estimated duration of the restoration project, as it is still being developed under  
627 Iberostar's *Wave of Change* movement. The program will engage with local communities, universities,  
628 government entities and tourism service providers to gather sustained funding into the future. Coral  
629 reef restoration envisioned by both groups is mainly motivated by experimental, biotic (i.e., enhance  
630 biodiversity, ecosystem connectivity, and ecological resilience), idealistic and pragmatic reasons (i.e.,  
631 enhanced water quality and ecosystem services, shallow-water essential fish habitat, restore depleted  
632 fisheries, enhanced tourism, and coastal protection of local coral reefs. The collaborative restoration  
633 project follows four specific objectives: 1) to develop genotyped coral nurseries, which represent the  
634 coral diversity at Cozumel Island; 2) to establish sufficient material in the coral nurseries to develop  
635 activities for education, research, technological innovation, recreation and tourism; 3) to yield  
636 sufficient material for the establishment of transplant zones; and 4) to collect gametes during the  
637 spawning season for larval rearing and use the larval propagation technique to grow sexual recruits at  
638 the transplantation site. The recently established coral restoration group between Iberostar and  
639 CINVESTAV aims to start with the development of four genotyped coral nurseries, two for *Acropora*  
640 *palmata* (3 and 5 m water depth) and two for *A. cervicornis* (10 and 13 m water depth). Each nursery  
641 will have 5 structures with a carrying capacity of approximately 40 fragments each enabling growth of  
642 800 corals at a time. The short-term (within one year) goal of the project is to gather enough genetic  
643 material for the development of activities related to education, research, technological innovation,  
644 recreation and tourism. In the medium term (within three years), these nurseries will provide the  
645 necessary genetic material to establish outplanting sites. The project envisions gamete collection

646 during the spawning season to reseed the transplant site with laboratory-grown coral larvae. The  
 647 project intends to create new nurseries in the future and incorporate additional reef-building coral  
 648 species such as *Pseudodiploria* spp., *Siderastrea* spp., *Diploria labyrinthiformis* and *Orbicella* spp. The  
 649 group is open to new partners interested in participating in the project. This program will not only be  
 650 important and necessary to achieve the conservation of Critically Endangered coral species and  
 651 recover the ecosystem functions and services provided by the reefs on Cozumel, but it will also  
 652 become a platform for environmental research and education for the area. It is envisioned for the  
 653 project to become a major tourist attraction on the island, with a scientific basis, which can serve as a  
 654 buffer for adjacent reef areas.

655 *Tables*

656 **Table S1:** Overview of coral restoration techniques employed by the projects in the Caribbean and  
 657 Eastern Tropical Pacific.

| Country, Location, Organization                                             | Direct transplantation | Coral gardening | Micro-fragmentation | Larval propagation |
|-----------------------------------------------------------------------------|------------------------|-----------------|---------------------|--------------------|
| <b>Implemented and in progress as of 2019</b>                               |                        |                 |                     |                    |
| Colombia, Taganga, Caribbean Sea, Alianza Coralina Taganga                  |                        |                 | X                   |                    |
| Colombia, San Andres and Providencia Islands, Caribbean Sea, Corales de Paz |                        | X               | X                   |                    |
| Costa Rica, Golfo Dulce, Eastern Tropical Pacific, Raising Coral Costa Rica |                        | X               | X                   |                    |
| Dominican Republic, Bayahibe, Caribbean Sea, FUNDEMAR                       |                        | X               |                     | X                  |
| Dominican Republic                                                          |                        | X               |                     |                    |

Location, Bayahibe,  
Caribbean Sea, The  
Iberostar Group

Dominican Republic,  
Punta Cana,  
Caribbean Sea,  
Fundación Grupo  
Puntacana

X

X

Mexico, Chetumal  
Stakeholder,  
Caribbean Sea,  
Oceanus A.C.

X

Mexico, Mexican  
Caribbean, Caribbean  
Sea, CORALIUM,  
Universidad Nacional  
Autónoma de México

X

Puerto Rico, Culebra  
Island, Caribbean Sea,  
Sociedad Ambiente  
Marino

X

X

X

**Planned work**

Colombia, Gorgona  
National Natural Park,  
Eastern Tropical  
Pacific, ECOMARES

X

Mexico, Cozumel  
National Natural Park,  
Caribbean Sea, The  
Iberostar &  
CINVESTAV Group:

X

658

659

660 **Table S2:** List of *in situ* *Acropora cervicornis* propagation nurseries by FUNDEMAR. Abbreviation:  
 661 *Acropora cervicornis* (Acer).

| Location                                                          | Site                            | Latitude  | Longitude  | Year established | Species |
|-------------------------------------------------------------------|---------------------------------|-----------|------------|------------------|---------|
| Coral reefs of the south-eastern zone (South of marine sanctuary) | FUNDEMAR                        | 18.3609°  | -68.84515° | 2011             | Acer    |
|                                                                   | CATALONIA                       | 18.34029° | -68.82735° | 2014             | Acer    |
|                                                                   | DREAMS                          | 18.36965° | -68.85346° | 2015             | Acer    |
|                                                                   | SCUBA FUN                       | 18.34436° | -68.83389° | 2015             | Acer    |
|                                                                   | VIVA                            | 18.34590° | -68.83274° | 2015             | Acer    |
|                                                                   | IBEROSTAR                       | 18.33915° | -68.82641° | 2016             | Acer    |
|                                                                   | CANOA                           | 18.34151° | -68.82789° | 2016             | Acer    |
|                                                                   | CATUANO                         | 18.19426° | -68.78007° | 2018             | Acer    |
| Coral reefs of the south-eastern zone (North of marine sanctuary) | CATALONIA - BÁVARO              | 18.65728° | -68.35378° | 2016             | Acer    |
| Las Terrenas                                                      | Coralas Las Terrenas Foundation | 19.33657° | -69.57264° | 2017             | Acer    |

662

663

664 **Table S3:** List of sites where asexual colonies of *Acropora cervicornis* propagated in the nurseries have  
 665 been outplanted to date by FUNDEMAR.

| Location                                                      | Site                    | Latitude   | Longitude  | Outplanting year |
|---------------------------------------------------------------|-------------------------|------------|------------|------------------|
| Coral reefs of the south-eastern part of the marine sanctuary | Magallán                | 18.3609°   | -68.84515° | 2013-2017        |
|                                                               | Coralina                | 18.37083°  | -68.84840° | 2013             |
|                                                               | Pepito I                | 18.34533°  | -68.83232° | 2014-2016        |
|                                                               | Pepito II               | 18.34424°  | -68.83087° | 2014-2016        |
|                                                               | Atlantic Princess       | 18.3691°   | -68.85225° | 2016-2019        |
|                                                               | Costa Romántica         | 18.38245°  | -68.85043° | 2016             |
|                                                               | Playita                 | 18.37308°  | -68.85326° | 2017-2018        |
|                                                               | Vivero Catalonia Bávaro | 18.65728°  | -68.35378° | 2018             |
|                                                               | Vivero Scuba Fun        | 18.34436°  | -68.83389° | 2018             |
|                                                               | Vivero Fundemar         | 18.3609°   | -68.84515° | 2019             |
| Vivero Iberostar                                              | 18.33915°               | -68.82641° | 2019       |                  |
| Vivero Catalonia                                              | 18.34029°               | -68.82735° | 2019       |                  |

666

667

668 **Table S4:** List of monitoring spawning sites of FUNDEMAR. Abbreviation: *Acropora cervicornis* (Acer),  
 669 *Colpophyllia natans* (Cnat), *Montastraea cavernosa* (OCav), *Orbicella annularis* (Oann), *Orbicella*  
 670 *faveolata* (Ofav), *Dendrogyra cylindrus* (Dcyl), and *Diploria labyrinthiformis*.

| Location                                                      | Site            | Latitude  | Longitude  | Sight year | Species                              |
|---------------------------------------------------------------|-----------------|-----------|------------|------------|--------------------------------------|
| Coral reefs of the south-eastern part of the marine sanctuary | Vivero Fundemar | 18.3609°  | -68.84515° | 2015-2018  | Acer<br>Cnat<br>OCav<br>Oann<br>Ofav |
|                                                               | Playita         | 18.37308° | -68.85326° | 2017-2018  | Acer<br>Dcyl<br>Dlab                 |

671

672 **Table S5:** Estimated feasibility of the reef restoration major objectives of the Iberostar Group.

| Objective                                                  | Estimated feasibility | Minimum feasibility | Maximum feasibility |
|------------------------------------------------------------|-----------------------|---------------------|---------------------|
| 1. Determine current intraspecific diversity               | 0.4                   | 0.2                 | 0.8                 |
| 2. Enhance intra- and inter-specific diversity             | 0.6                   | 0.3                 | 0.8                 |
| 3. Maintain <i>in situ</i> and <i>ex situ</i> genetic bank | 0.6                   | 0.2                 | 1                   |
| 4. Engage hotel clients and staff                          | 0.6                   | 0.3                 | 0.8                 |
| 5. Characterise individual physiological traits of corals  | 0.4                   | 0.1                 | 0.7                 |
| 6. Enhance resilience in restored reefs.                   | 0.4                   | 0.1                 | 0.8                 |
| <b>Mean feasibility</b>                                    | <b>0.5</b>            | <b>0.2</b>          | <b>0.8</b>          |

673

674

675 **Table S6:** List of all restoration sites of Oceanus A.C.

| <b>Location</b>  | <b>Site</b>                       | <b>Latitude</b> | <b>Longitude</b> |
|------------------|-----------------------------------|-----------------|------------------|
| Punta Allen      | Punta Allen                       | -87.418218      | 19.739874        |
| Chacmool         | Maria Elena La poza               | -87.441697      | 19.457694        |
| Herrero          | Transplante Faro                  | -87.43832       | 19.31689         |
| Veracruz         | Arrecife Anegada de Adentro PNSAV | -96.061416      | 19.230431        |
| Veracruz         | Arrecife Pájaros PNSAV            | -96.081941      | 19.186026        |
| Xcalac           | La Poza XC                        | -87.82558       | 18.260935        |
| Xcalac           | Parche Chol                       | -87.831978      | 18.216738        |
| Puerto Morelos   | Rodman                            | -86.853884      | 20.870556        |
| Puerto Morelos   | Jardines                          | -86.880334      | 20.831163        |
| Puerto Morelos   | La Pared                          | -86.876528      | 20.823953        |
| Playa del Carmen | Mayakobá                          | -87.015281      | 20.678092        |
| Mahahual         | Rio Bermejo                       | -87.715526      | 18.685029        |
| Mahahual         | Margarita del Sol                 | -87.71932       | 18.667874        |
| Xcalac           | Acocote                           | -87.807633      | 18.341611        |
| Cozumel          | Chankanaab                        | -86.995572      | 20.442498        |
| Cozumel          | El Palmar                         | -86.986468      | 20.459119        |

676

677



678 **Table S7:** List of sites where coral sexual recruits produced in the laboratory have been outplanted by  
 679 CORALIUM. Abbreviations: *Acropora palmata* (Apal), *Orbicella faveolata* (Ofav), *Orbicella annularis*  
 680 (Oann), *Pseudodiploria strigosa* (Pstr), and *Diploria labyrinthiformis* (Dlab).

| Location       | Site      | Latitude    | Longitude   | Outplanting year | Species                              |
|----------------|-----------|-------------|-------------|------------------|--------------------------------------|
| Cancún         | Cuevones  | 21.161694°  | -86.740972° | 2015-2016        | Apal                                 |
| Puerto Morelos | Cuevones  | 20.91897°   | -86.830149° | 2017             | Apal                                 |
|                | Manchones | 20.97855°   | -86.800631° | 2018             | Ofav<br>Oann                         |
|                | Picudas   | 20.88385°   | -86.848144° | 2015-2017        | Apal                                 |
|                | Jardines  | 20.830981°  | -86.874981° | 2018             | Apal<br>Oann<br>Ofav<br>Pstr<br>Dlab |
| Punta Allen    | Pajaritos | 19.6722861° | -87.417244° | 2018             | Apal<br>Ofav<br>Dlab                 |
| Puerto Herrero | Quebrado  | 19.365458°  | -87.439407° | 2015             | Apal                                 |
| Xcalak         | Portillas | 19.6722861° | -87.833233° | 2015             | Apal                                 |

681

682

683 **Supplementary Excel file**

684

685 **Table S8:** Spatial information of all restoration projects (including sites of nurseries and outplanting  
686 sites).

687 File: Data\_coral\_reef\_restoration.xlsx

688 Tab: 'Spatial information'

689

690 **Table S9:** Motivations or rationales for conducting the coral reef restoration projects grouped by the  
691 categories: 1) biotic; 2) experimental; 3) idealistic; 4) legislative; and 5) pragmatic.

692 File: Data\_coral\_reef\_restoration.xlsx

693 Tab: 'Motivations'

694

695 **Table S10:** Specific objectives of all coral reef restoration projects grouped into the categories: 1)  
696 enhance ecosystem services for the future; 2) optimize/scale-up restoration approach; 3) promote  
697 coral reefs; 4) conservation stewardship; 5) provide alternative, sustainable livelihood opportunities;  
698 6) reduce population declines and ecosystem degradation; and 7) re-establish a self-sustaining,  
699 functioning reef ecosystem.

700 File: Data\_coral\_reef\_restoration.xlsx

701 Tab: 'Specific objectives'

702

703 **Table S11:** Cost, spatial extent of intervention, project duration and feasibility of coral reef restoration  
704 projects.

705 File: Data\_coral\_reef\_restoration.xlsx

706 Tab: 'Cost & feasibility'

707
